# Supplementary material for: Differentiating sepsis from non-infectious systemic inflammation based on microvesicle-bacteria aggregation
Source: Royal Society of Chemistry journal article supplement (doi:10.1039/c5nr01851j), 2015-01-01
Supplement: c5nr01851j1.pdf [file c5nr01851j1.pdf]

- SUPPORTING INFORMATION -

**Differentiating Sepsis from Non-Infectious Systemic Inflammation based on  
Microvesicle-Bacteria Aggregation**

*Inge K. Herrmann, Sergio Bertazzo, David J. P. O'Callaghan, Andrea A. Schlegel, Charalam-  
bos Kallepitis, David B. Antcliffe, Anthony C. Gordon, Molly M. Stevens\**

**\*Corresponding Author**

Prof. Molly M. Stevens

Department of Materials, Department of Bioengineering and Institute of Biomedical Engineer-  
ing,

Imperial College London,

Prince Consort Road,

London SW7 2AZ, UK

[m.stevens@imperial.ac.uk](mailto:m.stevens@imperial.ac.uk)

**Figure S1:**

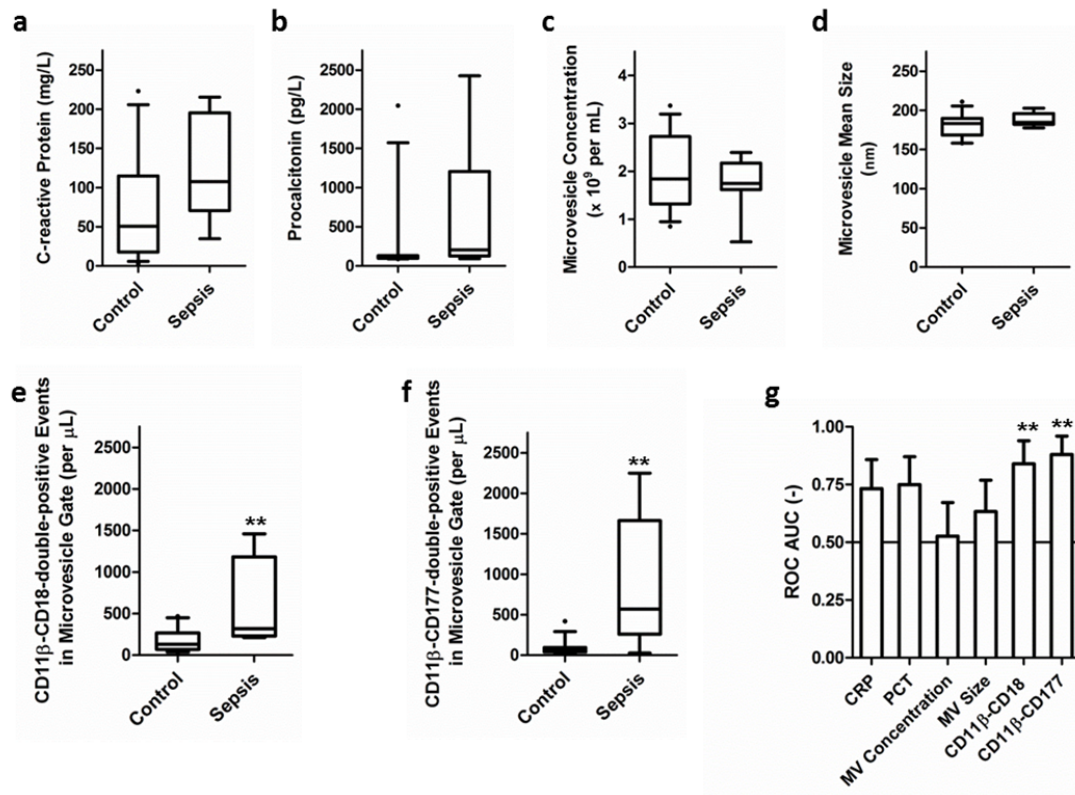

**Figure S1. Markers of Inflammation and Microvesicle Characteristics in Patient Plasma Samples.** Concentrations for the clinically used sepsis biomarker C-reactive protein (CRP, **a**) and Procalcitonin (PCT, **b**) in the sepsis (n = 8) and control group (n = 14). Microvesicle plasma concentration measured by NTA (**c**) and mean size (**d**) in control group and sepsis patients (after ultracentrifugation). Number concentration of CD11 $\beta$ /CD177-double positive microvesicles and CD11 $\beta$ /CD18-double positive microvesicles in patient plasma samples analysed by flow cytometry (**e**,**f**). Receiver Operating Characteristic (ROC) analyses for CRP, PCT, microvesicle concentration and size, and CD11 $\beta$ /CD177 and CD11 $\beta$ /CD18-double positive microvesicles (**g**).

**Figure S2**

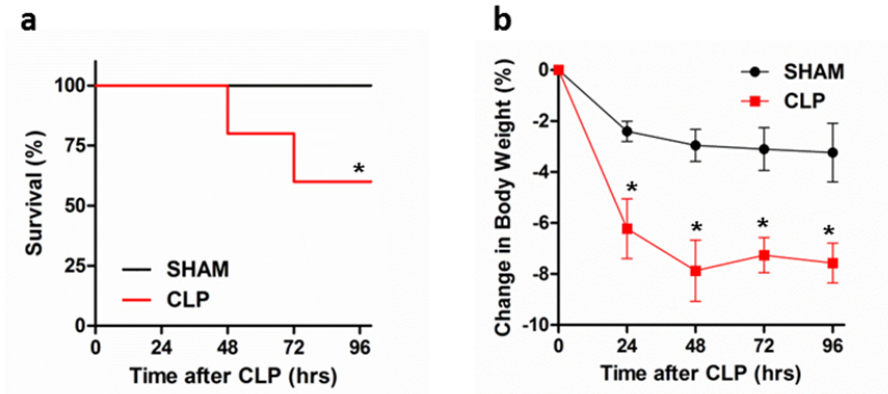

**Figure S2. Experimental Sepsis Model.** Kaplan-Meier survival curve for SHAM and CLP animals (a) and relative change in body weight (b).

**Table S1: Patient Characteristics.**

|                                          | Primary Investigation Cohort    |                    | Validation Cohort              |                    |
|------------------------------------------|---------------------------------|--------------------|--------------------------------|--------------------|
|                                          | Non-sepsis control group (N=14) | Sepsis group (N=8) | Non-sepsis control group (N=6) | Sepsis group (N=6) |
| <b>Gender</b>                            |                                 |                    |                                |                    |
| Male                                     | 43%                             | 50%                | 67%                            | 67%                |
| Female                                   | 57%                             | 50%                | 33%                            | 33%                |
| <b>Age</b>                               |                                 |                    |                                |                    |
| Mean +/- SD                              | 60 ± 11                         | 63 ± 12            | 58 ± 11                        | 68 ± 16            |
| Median (Range)                           | 60.5 (18.25)                    | 62.5 (18)          | 57.5 (17.5)                    | 69.5 (15.75)       |
| <b>Localisation of infection</b>         |                                 |                    |                                |                    |
| Pulmonal                                 | n.a.                            | 62.50%             | n.a.                           | 83%                |
| Abdominal                                | n.a.                            | 37.50%             | n.a.                           | 17%                |
| <b>Diagnosis</b>                         |                                 |                    |                                |                    |
| Stroke                                   | 21.5%                           | 0                  | 16.3%                          | 0                  |
| Brain hemorrhage                         | 57.5%                           | 50%                | 50%                            | 16.5%              |
| Seizures                                 | 7.0%                            | 0                  | 0                              | 0                  |
| Neurodegenerative disease                | 7.0%                            | 0                  | 16.3%                          | 0                  |
| Gastrointestinal bleed                   | 0                               | 0                  | 16.3%                          | 0                  |
| Cardiac arrest                           | 7.0%                            | 0                  | 0                              | 0                  |
| Pneumonia                                | 0                               | 25%                | 0                              | 67%                |
| Sepsis                                   | 0                               | 25%                | 0                              | 16.5%              |
| <b>Microbiology</b>                      |                                 |                    |                                |                    |
| Gram-positive                            | n.a.                            | 37.50%             | n.a.                           | 0                  |
| Gram-negative                            | n.a.                            | 37.50%             | n.a.                           | 33%                |
| Undocumented                             | n.a.                            | 25%                | n.a.                           | 67%                |
| <b>Number of SIRS criteria</b>           |                                 |                    |                                |                    |
| Mean +/- SD                              | 2.2 ± 0.8                       | 3.3 ± 1.2          | 2.2 ± 0.4                      | 3 ± 0.75           |
| Median (Range)                           | 2 (0.75)                        | 4 (1.25)           | 2 (0)                          | 3 (1)              |
| <b>APACHE II SCORE</b>                   |                                 |                    |                                |                    |
| Mean +/- SD                              | 19.5 ± 6.7                      | 22.4 ± 8.4         | 20.3 ± 5.7                     | 21 ± 3             |
| Median (Range)                           | 19.5 (6.75)                     | 21.5 (4.25)        | 18.5 (4)                       | 21 (2.25)          |
| <b>Medication</b>                        |                                 |                    |                                |                    |
| Vasopressors                             | 71%                             | 62.5%              | 50%                            | 50%                |
| <b>Other parameters</b>                  |                                 |                    |                                |                    |
| White blood cell count in millions, ± SD | 11.8 ± 5.9                      | 16.1 ± 6           | 8 ± 5                          | 14.5 ± 2           |
| T <sub>min</sub> (°C), ± SD              | 35.8 ± 1.9                      | 36.3 ± 0.8         | 35.5 ± 0.8                     | 36.4 ± 1.7         |
| T <sub>max</sub> (°C), ± SD              | 37.6 ± 1.1                      | 38.2 ± 1           | 38 ± 0.7                       | 37 ± 1.2           |
| Heart rate (bpm), ± SD                   | 82 ± 20                         | 113 ± 34           | 87 ± 14                        | 121 ± 40           |
| <b>Outcome</b>                           |                                 |                    |                                |                    |
| Mortality (%)                            | 14%                             | 50%                | 33%                            | 66%                |

**Table S2: Patient Inclusion/Exclusion Criteria.**

|                           |                                                                                                                                                                                                                                                                                                                                                                                                                                                                                                                                                                                                                |
|---------------------------|----------------------------------------------------------------------------------------------------------------------------------------------------------------------------------------------------------------------------------------------------------------------------------------------------------------------------------------------------------------------------------------------------------------------------------------------------------------------------------------------------------------------------------------------------------------------------------------------------------------|
| <b>Inclusion Criteria</b> | <ul style="list-style-type: none"><li>• Adults (&gt; 16 years)</li><li>• Intubated and ventilated within the previous 48 hours</li><li>• Expected to be ventilated for &gt; 48 hours</li><li>• Fulfill 2/4 systemic inflammatory response syndrome (SIRS) criteria:<ul style="list-style-type: none"><li>▪ temp &lt; 36 or &gt; 38;</li><li>▪ heart rate &gt; 90 bpm;</li><li>▪ respiratory rate &gt; 20 or paCO<sub>2</sub> &lt; 4.3 or need for mechanical ventilation;</li><li>▪ leukocyte count &gt; 12,000 cells/mm<sup>3</sup> &lt; 4000 cells/mm<sup>3</sup> or &gt; 10% band forms</li></ul></li></ul> |
| <b>Exclusion Criteria</b> | <ul style="list-style-type: none"><li>• Immunosuppression</li><li>• Use of granulocyte colony stimulating factor</li></ul>                                                                                                                                                                                                                                                                                                                                                                                                                                                                                     |
